# Supplementary material for: Effects and related mechanisms of serotonin on malignant biological behavior of hepatocellular carcinoma via regulation of Yap
Source: PubMed Central journal article supplement (PMC5564575; doi:10.18632/oncotarget.17658), 2017-05-07
Supplement: oncotarget-08-47412-s001.pdf [file oncotarget-08-47412-s001.pdf]

## Effects and related mechanisms of serotonin on malignant biological behavior of hepatocellular carcinoma via regulation of Yap

### Supplementary Materials

**Supplementary Table 1: siRNA**

| siRNAs        | Sequence (5'-3')             |
|---------------|------------------------------|
| Control siRNA | 5'-GCAAGCUGACCCUGAAGUUCAU-3' |
| Yap-siRNA #1  | 5'-CCACCAAGCUAGAUAAAAGA-3'   |
| Yap-siRNA #2  | 5'-GAACAUAGAAGGAGAGGAG-3'    |

**Supplementary Table 2: Primers**

| Target              | Sequence (5'-3')                                                     |
|---------------------|----------------------------------------------------------------------|
| GAPDH               | F : 5'-CGCGAGAAGATGACCCAGAT-3'<br>R : 5'-GCACTGTGTTGGCGTACAGG-3'     |
| 5HT <sub>1A</sub> R | F : 5'-GGCAATGCCTGCGTGGTTGC-3'<br>R : 5'-TGGCGCACAGGTGCAGGATG-3'     |
| 5HT <sub>1B</sub> R | F : 5'-CTCCCGCCACCTCCCAGACA-3'<br>R : 5'-GGGTGTGCAGCTTCCGGGTC-3'     |
| 5HT <sub>2A</sub> R | F : 5'-TTCACCACAGCCGCTTCAA-3'<br>R : 5'-ATCCTGTAGTCCAAAGACTGGGATT-3' |
| 5HT <sub>2B</sub> R | F : 5'-GGCTGATTTGCTGGTTGGATTG-3'<br>R : 5'-GGCCATGTAGCCTCAAACATG-3'  |
| 5-HT <sub>4</sub> R | F : 5'-GTGCTAAGGTATACAGTTTTGC-3'<br>R : 5'-CCAGGGACTCTGGGTCATTG-3'   |
| 5-HT <sub>3</sub> R | F : 5'-GCCGCTGTGTGTTGGTCTCT-3'<br>R : 5'-GACGGTGGCGTGACGGACAG-3'     |
| 5-HT <sub>7</sub> R | F : 5'-ATTGTGTCCCTGGCGCTGGC-3'<br>R : 5'-CGAGGCCGTGCAGCACATGA-3'     |
| E-cadherin          | F : 5'-TAACCGATCAGAATGAC-3'<br>R : 5'-TTTGTCAGGGAGCTCAGGAT-3'        |
| Vimentin            | F : 5'-GAGAACTTTGCCGTTGAAGC-3'<br>R : 5'-GCTTCCTGTAGGTGGCAATC-3'     |
